## List of referees

The editors would like to thank all those listed below for their assistance in refereeing papers submitted for inclusion in the Symposium proceedings.

|                     |                 |                 |
|---------------------|-----------------|-----------------|
| T. A. Bakke         | J. Heggenes     | S. J. Northcott |
| J. A. Beardmore     | B. Hill         | B. O'Connor     |
| B. A. Berejikian    | K. Hindar       | T. R. Porter    |
| J. H. S. Blaxter    | J. A. Hutchings | D. Reddin       |
| E. A. Bourke        | P. J. Jacobsen  | F. Renaud       |
| J. E. Bron          | S. C. Johnson   | B. E. Riddell   |
| J. Browne           | R. Johnstone    | J. A. Ritter    |
| J. W. Carr          | H. Jansson      | N. Ryman        |
| G. Choubert         | J. Jonasson     | S. Scott        |
| R. H. Cook          | B. Jonsson      | O. Skaala       |
| I. G. Cowx          | W. C. Jordan    | J. B. Taggart   |
| T. F. Cross         | L. Karlsson     | J. E. Thorpe    |
| A. K. Danielsdottir | J. J. Kocik     | G. A. Tingley   |
| W. S. Davidson      | G. L. Lacroix   | O. Tully        |
| L.-O. Eiriksson     | R. A. Lund      | E. Verspoor     |
| A. Ferguson         | H. Lura         | J. H. Webb      |
| B. Finstad          | K. H. Mann      | K. F. Whelan    |
| J. A. Fleming       | S. McKinnell    | N. P. Wilkins   |
| P. Galvin           | A. H. McVicar   | C. Wood         |
| C. Garcia de Leaniz | N. B. Metcalfe  | A. F. Youngson  |
| L. P. Hansen        | N. J. Milner    |                 |
| T. Hansen           | J. Mork         |                 |

The editors would also like to thank all those listed below who have given their time and expertise to referee papers submitted to ICES Journal of Marine Science.

|                  |                 |                 |
|------------------|-----------------|-----------------|
| J. Allard        | P. J. Clapham   | R. W. Furness   |
| J. T. Anderson   | A. Clark        | D. J. Garrod    |
| A. D. Ansell     | C. Clemmensen   | D. Gaskin       |
| E. Aro           | R. Coombs       | S. Gavaris      |
| D. B. Atkinson   | A. J. R. Cotter | B. Gillanders   |
| O. Bagge         | D. H. Cushing   | D. Gillis       |
| F. M. Baldursson | N. Daan         | H. Gislason     |
| M. Barange       | G. Dahle        | A. Grioche      |
| M. Basson        | P. Degnbol      | S. Hansson      |
| W. Bayliff       | S. S. de Silva  | J. Harris       |
| D. B. Bennett    | J. Dos Santos   | D.-L. Hartley   |
| P. B. Best       | H. Dupouy       | E. Hatfield     |
| J. Beyer         | J. R. Ellis     | D. Hayes        |
| K. Black         | Ø. Fisker       | C. Heip         |
| J. H. S. Blaxter | J. Fives        | T. E. Helser    |
| K. Brander       | R. Flatt        | J. E. Hightower |
| M. Burrows       | W. J. Fletchers | K. Hobson       |
| N. Cadigan       | M. Fogarty      | H. Jakupstovu   |
| S. Campana       | K. G. Foote     | P. Jones        |
| A. Campbell      | M. G. Foote     | T. Jørgensen    |
| E. Carmack       | A. R. Foster    | M. Kaiser       |
| J. Carscadden    | A. Fréchet      | E. Kenchington  |
| J. Casey         | K. Friedland    | A. Kenny        |
| M. Chittenden    | R. J. Fryer     | M. J. Kingsford |

G. P. Kirkwood  
R. Kronlund  
D. W. Kulka  
D. Lane  
F. Larsen  
D. Levi  
P. Lewy  
G. R. Lilly  
O. Linden  
N. Lo  
H. Loeng  
G. Lough  
K. MacKenzie  
S. Malmberg  
D. Marcotte  
J. Masse  
J. Mauchline  
S. McClatchie  
C. McKenzie  
A. H. McVicar  
W. Meadows  
B. Megrey  
B. Mesnil  
R. Millar  
R. K. Mohn  
E. Moksness  
M. Monk  
B. Morin

T. J. Mulligan  
P. Munk  
S. Murawski  
R. A. Myers  
G. Nævdal  
W. Neill  
J. Neilson  
J. H. Nichols  
M. Nicholson  
T. Nickell  
A. Nissling  
A. Parma  
R. Parmanne  
D. Pauly  
S. Pederson  
D. Pelletier  
R. I. Perry  
P. Pepin  
P. Petitgas  
I. G. Priede  
A. Punt  
T. Quinn  
F. Redant  
V. Restrepo  
G. Rigby  
A. D. Rijnsdorp  
S. I. Rogers  
S. Saila

G. Sangster  
P. T. Santos  
H. P. M. Schobber  
C. Schwarz  
A. Sinclair  
P. Smith  
S. Smith  
J. H. Steele  
G. Stefánsson  
W. T. Stobo  
K. Stokes  
P. J. Sullivan  
D. P. Swain  
R. Tanasichuk  
M. Tasker  
A. Temming  
G. G. Thompson  
E. Trippel  
M. Tupper  
W. Turrell  
H. W. van der Veer  
B. van Marlen  
M. Waldock  
M. Walsh  
S. J. Walsh  
C. Walters  
R. Wootten  
P. Wright
